# Supplementary material
Source: ML conference proceedings conference paper supplement (https://openaccess.thecvf.com/content/ACCV2022/html/Kim_Vision_Transformer_Compression_ACCV_2022_paper.html)
Supplement: Supplementary file 1 [file Kim_Vision_Transformer_Compression_ACCV_2022_supplemental.pdf]

# Vision Transformer Compression and Architecture Exploration with Efficient Embedding Space Search Supplement Material

Daeho Kim<sup>1</sup>[0000-0003-2921-3168] and Jaeil Kim<sup>2,\*</sup>[0000-0002-9799-1773]

<sup>1</sup> Department of Artificial Intelligence, Kyungpook National University

<sup>2</sup> School of Computer Science and Engineering, Kyungpook National University  
{kdaeho27, threeyears}@gmail.com

## 1 Proof of Theorem 4

In this section, we prove Theorem 4. We compare Pre-LN Transformer and Res-Post-LN transformer in Table 1.  $\sigma$  indicates an activation function, and  $W^{1,l} \in \mathbb{R}^{d_m \times d}$  and  $W^{2,l} \in \mathbb{R}^{d \times d_m}$  are weight parameters in MLP. To calculate analytically, the hidden dimension  $d_m$  and the feature dimension  $d$  are considered identical in MLP. We denote the output feature  $Y_{1,i}^{\text{res}}$  at  $i$ -th position of the  $l$ -th layer, where  $Y_{1,i}^{\text{res}}$  is a real-valued tensor of dimension  $d$  with  $i = 1, 2, \dots, n$  and  $l = 1, 2, \dots, L$ .

**Lemma 1.** *For the Res-Post-LN transformer with initialized weights,  $\mathbb{E}(\|Y_{l+1,i}^{\text{res}}\|_2^2) \leq 2[(2l-1)d^2 + ld]$  for all  $l > 0$  and  $i$ .*

**Proof of Lemma 1** We first estimate the expectation of  $\|Y_{l,i}^{\text{res}}\|_2^2$  for  $l > 0$ . Since  $\|\text{LN}(\cdot)\|_2^2 = d$  by Lemma 2 in [1],

$$\begin{aligned} \mathbb{E}(\|Y_{l,i}^{\text{res}}\|_2^2) &= \mathbb{E}(\|Y_{1,i}^{\text{res}} + \sum_{k=1}^{l-1} (\text{LN}(Y_{k,i}^{\text{res},2}) + \text{LN}(Y_{k,i}^{\text{res},6}))\|_2^2) \\ &\leq \mathbb{E}(\|Y_{1,i}^{\text{res}} + \sum_{k=1}^{l-1} \text{LN}(Y_{k,i}^{\text{res},2}) + \sum_{k=1}^{l-1} \text{LN}(Y_{k,i}^{\text{res},6})\|_2^2) \\ &\leq \mathbb{E}(\|Y_{1,i}^{\text{res}}\|_2^2) + \mathbb{E}(\|\sum_{k=1}^{l-1} \text{LN}(Y_{k,i}^{\text{res},2})\|_2^2) + \mathbb{E}(\|\sum_{k=1}^{l-1} \text{LN}(Y_{k,i}^{\text{res},6})\|_2^2) \\ &\leq 2(l-1)d \end{aligned}$$

---

\* Corresponding author

Table 1: Pre-LN Transformer v.s. Res-Post-LN Transformer

| Pre-LN Transformer                                                                    | Res-Post-LN Transformer                                                               |
|---------------------------------------------------------------------------------------|---------------------------------------------------------------------------------------|
| $Y_l^{\text{pre},1} = \text{LN}(Y_l^{\text{pre}})$                                    | $Y_l^{\text{res},1} = \text{LN}(Y_l^{\text{res}})$                                    |
| $Y_l^{\text{pre},2} = \text{MSA}(Y_l^{\text{pre},1})$                                 | $Y_l^{\text{res},2} = \text{MSA}(Y_l^{\text{res}})$                                   |
| $Y_l^{\text{pre},3} = Y_l^{\text{pre}} + Y_l^{\text{pre},2}$                          | $Y_l^{\text{res},3} = \text{LN}(Y_l^{\text{res},2})$                                  |
| $Y_l^{\text{pre},4} = \text{LN}(Y_l^{\text{pre},3})$                                  | $Y_l^{\text{res},4} = Y_l^{\text{res}} + Y_l^{\text{res},3}$                          |
| $Y_l^{\text{pre},5} = \sigma(Y_l^{\text{pre},4} W^{1,l} + b^{1,l}) W^{2,l} + b^{2,l}$ | $Y_l^{\text{res},5} = \text{LN}(Y_l^{\text{res},4})$                                  |
| $Y_{l+1}^{\text{pre}} = Y_l^{\text{pre},5} + Y_l^{\text{pre},3}$                      | $Y_l^{\text{res},6} = \sigma(Y_l^{\text{res},5} W^{1,l} + b^{1,l}) W^{2,l} + b^{2,l}$ |
| Final LN : $Y_{\text{Final}}^{\text{pre},1} = \text{LN}(Y_{l+1}^{\text{pre}})$        | $Y_l^{\text{res},7} = \text{LN}(Y_l^{\text{res},6})$                                  |
|                                                                                       | $Y_{l+1}^{\text{res}} = Y_l^{\text{res},4} + Y_l^{\text{res},7}$                      |
|                                                                                       | Final LN : $Y_{\text{Final}}^{\text{res},1} = \text{LN}(Y_{l+1}^{\text{res}})$        |

In a similar way, we have

$$\begin{aligned}
\mathbb{E}(\|Y_{l+1,i}^{\text{res}}\|_2^2) &= \mathbb{E}(\|Y_{l,i}^{\text{res},4}\|_2^2) + \mathbb{E}(\|Y_{l,i}^{\text{res},7}\|_2^2) + 2\mathbb{E}(Y_{l,i}^{\text{res},7} Y_{l,i}^{\text{res},4} \text{T}) \\
&= \mathbb{E}(\|Y_{l,i}^{\text{res}}\|_2^2) + \mathbb{E}(\|Y_{l,i}^{\text{res},3}\|_2^2) + \mathbb{E}(\|Y_{l,i}^{\text{res},7}\|_2^2) + 2\mathbb{E}(Y_{l,i}^{\text{res},7} Y_{l,i}^{\text{res},4} \text{T}) \\
&\leq 2(l-1)d + 2d + 2(2(l-1)d^2 + d^2) \\
&\leq 2[(2l-1)d^2 + ld]
\end{aligned}$$

Then, we have  $\mathbb{E}(\|Y_{l+1,i}^{\text{res}}\|_2^2) \leq 2[(2l-1)d^2 + ld]$ , which is bounded by  $\mathbb{E}(\|Y_{l+1,i}^{\text{res}}\|_2^2) \leq O(ld^2)$ .

**Proof of Theorem 4** The loss of the Res-Post-LN Transformer can be described as:

$$\tilde{\mathcal{L}}(Y_{\text{Final},1}^{\text{res}}, \dots, Y_{\text{Final},n}^{\text{res}}) = \frac{1}{n} \sum_{i=1}^n \mathcal{L}(Y_{\text{Final},i}^{\text{res}})$$

Using back-propagation, the gradient of  $\mathcal{L}(Y_{\text{Final},i}^{\text{res}})$  with respect to the last layer weights  $W^{2,L}$  can be written as

$$\begin{aligned}
\frac{\partial \mathcal{L}(Y_{\text{Final},i}^{\text{res}})}{\partial W_{pq}^{2,L}} &= \frac{\partial \mathcal{L}(Y_{\text{Final},i}^{\text{res}})}{\partial Y_{\text{Final},i}^{\text{res}}} \frac{\partial Y_{\text{Final},i}^{\text{res}}}{\partial Y_{L+1,i}^{\text{res}}} \frac{\partial Y_{L+1,i}^{\text{res}}}{\partial Y_{L,i}^{\text{res},7}} \frac{\partial Y_{L,i}^{\text{res},7}}{\partial Y_{L,i}^{\text{res},6}} \frac{\partial Y_{L,i}^{\text{res},6}}{\partial W_{pq}^{2,L}} \\
&= \frac{\partial \mathcal{L}(Y_{\text{Final},i}^{\text{res}})}{\partial Y_{\text{Final},i}^{\text{res}}} \mathbf{J}_{\text{LN}}(Y_{L+1,i}^{\text{res}}) \mathbf{J}_{\text{LN}}(Y_{L,i}^{\text{res},6}) (0, 0, \dots, [\sigma(Y_{L,i}^{\text{res},5} W^{1,L})]_p, \\
&\quad \dots, 0, 0)^T
\end{aligned}$$

Here,  $b^{2,l}$  is initialized to be 0 and  $[\sigma(Y_{L,i}^{\text{res},5}W^{1,L})]_p$  denotes the  $p$ -th element of  $\sigma(Y_{L,i}^{\text{res},5}W^{1,L})$ . The absolute value can be bounded by as follows:

$$\begin{aligned} \left| \frac{\partial \mathcal{L}(Y_{\text{Final},i}^{\text{res}})}{\partial W_{pq}^{2,L}} \right| &\leq \left\| \frac{\partial \mathcal{L}(Y_{\text{Final},i}^{\text{res}})}{\partial Y_{\text{Final},i}^{\text{res}}} \right\|_2 \|\mathbf{J}_{LN}(Y_{L+1,i}^{\text{res}})\|_2 \|\mathbf{J}_{LN}(Y_{L,i}^{\text{res},6})\|_2 \\ &\quad \|(0, 0, \dots, [\sigma(Y_{L,i}^{\text{res},5}W^{1,L})]_p, \dots, 0)\|_2 \\ &= \left\| \frac{\partial \mathcal{L}(Y_{\text{Final},i}^{\text{res}})}{\partial Y_{\text{Final},i}^{\text{res}}} \right\|_2 \|\mathbf{J}_{LN}(Y_{L+1,i}^{\text{res}})\|_2 \|\mathbf{J}_{LN}(Y_{L,i}^{\text{res},6})\|_2 \\ &\quad |[\sigma(Y_{L,i}^{\text{res},5}W^{1,L})]_p| \end{aligned}$$

According to Lemma 2 in [1],  $\|Y_{L,i}^{\text{res},5}\|_2^2 = d$  and  $[Y_{L,i}^{\text{res},5}W^{1,L}]_p$  obeys normal distribution  $N(0, 1)$ , we can have the following inequality using Chernoff bound

$$\begin{aligned} \Pr[|[\sigma(Y_{L,i}^{\text{res},5}W^{1,L})]_p| \geq a_0] &\leq \exp\left(-\frac{a_0^2}{2}\right) \\ \Pr[\sigma([Y_{L,i}^{\text{res},5}W^{1,L}]_p)^2 \geq 2 \ln 100d] &\leq \frac{0.01}{d} \end{aligned}$$

We have  $\sigma([Y_{L,i}^{\text{res},5}W^{1,L}]_p)^2 \leq 2 \ln 100d$  with probability at least 0.99, for all  $p = 1, 2, \dots, d$ . Since with probability  $1 - \delta(\epsilon)$ ,  $\frac{\|Y_{L+1,i}^{\text{res}}\|_2^2 - \mathbb{E}\|Y_{L+1,i}^{\text{res}}\|_2^2}{\mathbb{E}\|Y_{L+1,i}^{\text{res}}\|_2^2} \leq \epsilon$ , we have  $\|Y_{L+1,i}^{\text{res}}\|_2^2 \leq (1 + \epsilon)\mathbb{E}\|Y_{L+1,i}^{\text{res}}\|_2^2$ . Using Lemma 5 in [1], we have

$$\begin{aligned} \Pr[\|Y_{L+1,i}^{\text{res}}\|_2^2 \leq \alpha_0 \mathbb{E}\|Y_{L+1,i}^{\text{res}}\|_2^2] &\leq \frac{(1 + \epsilon)\mathbb{E}\|Y_{L+1,i}^{\text{res}}\|_2^2 - \mathbb{E}\|Y_{L+1,i}^{\text{res}}\|_2^2}{(1 + \epsilon - \alpha_0)\mathbb{E}\|Y_{L+1,i}^{\text{res}}\|_2^2} \\ &= \frac{\epsilon}{1 + \epsilon - \alpha_0} \end{aligned}$$

which equals

$$\Pr[\|Y_{L+1,i}^{\text{res}}\|_2^2 \geq \alpha_0 \mathbb{E}\|Y_{L+1,i}^{\text{res}}\|_2^2] \geq 1 - \frac{\epsilon}{1 + \epsilon - \alpha_0}$$

Using union bound, we have with probability  $0.99 - \delta(\epsilon) - \frac{\epsilon}{1 + \epsilon - \alpha_0}$

$$\begin{aligned} \left| \frac{\partial \mathcal{L}(Y_{\text{Final},i}^{\text{res}})}{\partial W_{pq}^{2,L}} \right|^2 &= \mathcal{O}(\|\mathbf{J}_{LN}(Y_{L+1,i}^{\text{res}})\|_2^2 \|\mathbf{J}_{LN}(Y_{L,i}^{\text{res},6})\|_2^2 |[\sigma(Y_{L,i}^{\text{res},5}W^{1,L})]_p|^2) \\ &\leq \mathcal{O}\left(\frac{2d^2 \ln 100d}{\|Y_{L+1,i}^{\text{res}}\|_2^2 \|Y_{L,i}^{\text{res},6}\|_2^2}\right) \leq \mathcal{O}\left(\frac{d^2 \ln d}{\alpha_0 \mathbb{E}\|Y_{L+1,i}^{\text{res}}\|_2^2 \mathbb{E}\|Y_{L,i}^{\text{res},6}\|_2^2}\right) \leq \mathcal{O}\left(\frac{\ln d}{\alpha_0 L d}\right) \end{aligned}$$

So we have

$$\left| \frac{\partial \tilde{\mathcal{L}}}{\partial W_{pq}^{2,L}} \right|^2 = \left| \frac{1}{n} \sum_{i=1}^n \frac{\partial \mathcal{L}(x_{\text{Final},i}^{\text{res}})}{\partial W_{pq}^{2,L}} \right|^2 = \mathcal{O}\left(\frac{\ln d}{\alpha_0 L d}\right)$$

Thus

$$\left\| \frac{\partial \tilde{\mathcal{L}}}{\partial W^{2,L}} \right\|_F = \sqrt{\sum_{p,q=1}^d \left| \frac{\partial \tilde{\mathcal{L}}}{\partial W_{pq}^{2,L}} \right|^2} \leq \mathcal{O}\left(\sqrt{\frac{d \ln d}{\alpha_0 L}}\right)$$

We can have the following result with probability at least  $0.99 - \delta(\epsilon) - \frac{\epsilon}{0.9+\epsilon}$  taking  $\alpha_0 = \frac{1}{10}$ , for the Res-Post-LN transformer

$$\left\| \frac{\partial \tilde{\mathcal{L}}}{\partial W^{2,L}} \right\|_F \leq \mathcal{O}\left(\sqrt{\frac{d \ln d}{L}}\right)$$

Since  $d$  and  $d_m$  are identical, we have

$$\left\| \frac{\partial \tilde{\mathcal{L}}}{\partial W^{2,L}} \right\|_F \leq \mathcal{O}\left(\sqrt{\frac{d_m \ln d_m}{L}}\right)$$

The above inequality corresponds to Theorem 4 in the main paper.

## References

1. Xiong, R., Yang, Y., He, D., Zheng, K., Zheng, S., Xing, C., Zhang, H., Lan, Y., Wang, L., Liu, T.: On layer normalization in the transformer architecture. In: International Conference on Machine Learning. pp. 10524–10533. PMLR (2020)
